# Supplementary material for: Atraumatic Sport-Related Medial Sesamoid Pain: Conservative Treatment Outcome and Magnetic Resonance Imaging Features
Source: PubMed Central journal article supplement — Clin Orthop Surg. 2024 Jun 4;16(4):641–9. doi: 10.4055/cios24037 (PMC11262941; doi:10.4055/cios24037), 2024-06-04
Supplement: cios-16-641-s001.pdf [file cios-16-641-s001.pdf]

**Supplementary Table 1.** Statistics for Interobserver Reliability and Intraobserver Reproducibility in the 27 Patients

| Variable                                                                                        | ICC (95% CI)              |                               |
|-------------------------------------------------------------------------------------------------|---------------------------|-------------------------------|
|                                                                                                 | Interobserver reliability | Intraobserver reproducibility |
| Hallux valgus angle (°)                                                                         | 0.84 (0.71–0.91)          | 0.88 (0.78–0.93)              |
| First to second metatarsal angle (°)                                                            | 0.89 (0.86–0.92)          | 0.88 (0.85–0.91)              |
| Meary's angle (°)                                                                               | 0.80 (0.66–0.86)          | 0.78 (0.64–0.85)              |
| Calcaneal pitch angle (°)                                                                       | 0.91 (0.89–0.97)          | 0.92 (0.91–0.96)              |
| Medial sesamoid position by Hardy and Clapham on anteroposterior foot radiographs <sup>9)</sup> | 0.88 (0.78–0.93)          | 0.86 (0.75–0.92)              |
| Medial sesamoid position by Choi et al. on forefoot axial radiographs <sup>14)</sup>            | 0.85 (0.73–0.92)          | 0.88 (0.78–0.93)              |

ICC: intraclass correlation coefficient, CI: confidence interval.
